# Supplementary material
Source: PubMed Central journal article supplement (PMC3564502)

ROC for MSD predicting motor <70

A

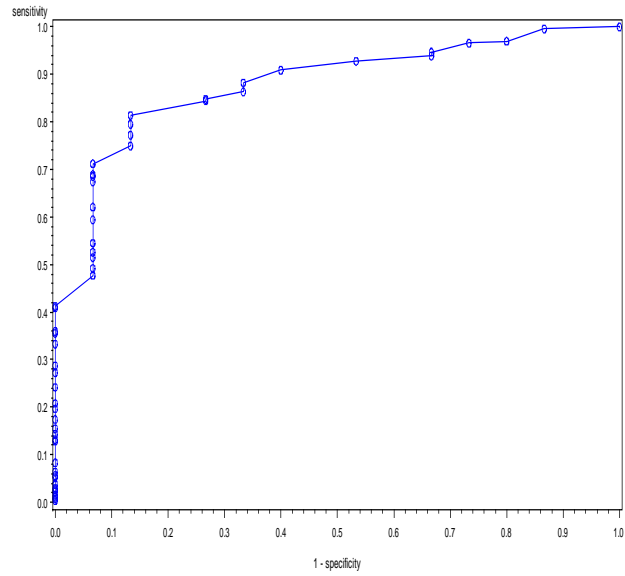

ROC for MSD predicting cognitive <85

C

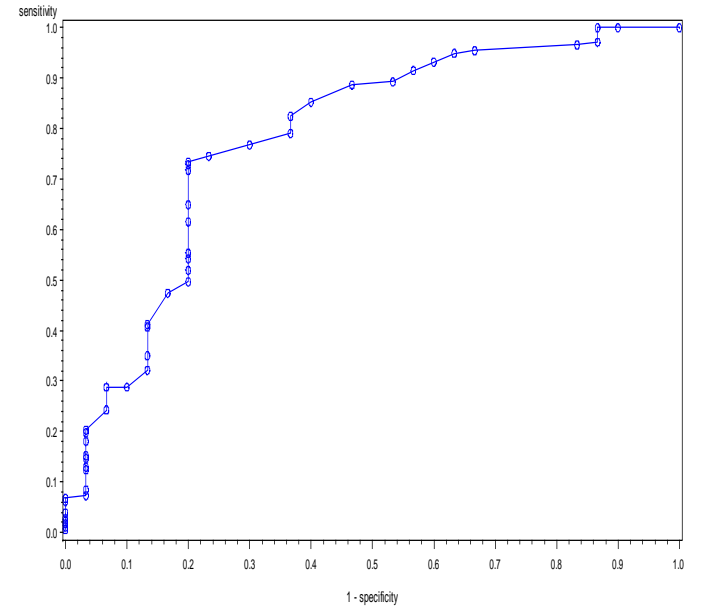

ROC for MSD predicting motor <85

B

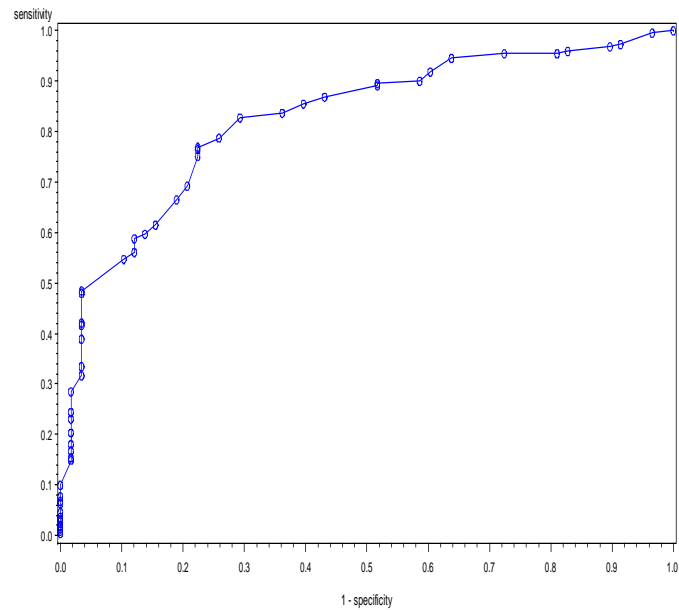

ROC for MSD predicting cognitive <70

D

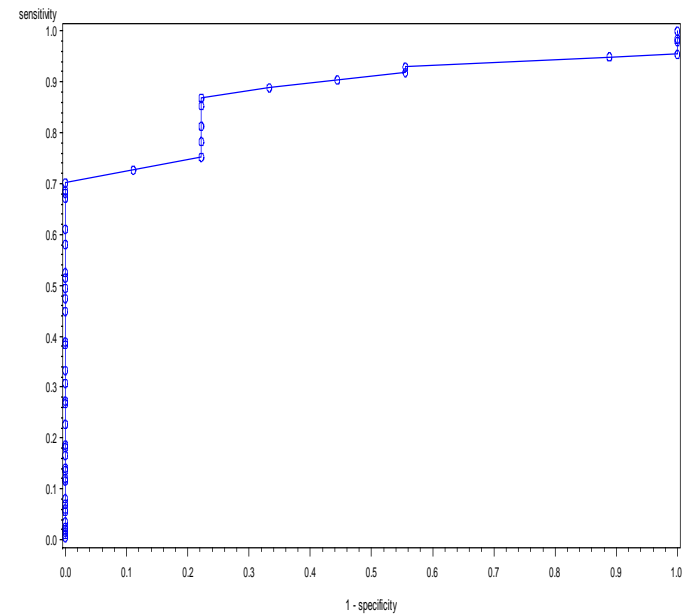

Supplement: NIHMS417906-supplement-Supp_FigureS2.pdf [file NIHMS417906-supplement-Supp_FigureS2.pdf]
