# Supplementary material
Source: PubMed Central journal article supplement (PMC3564502)

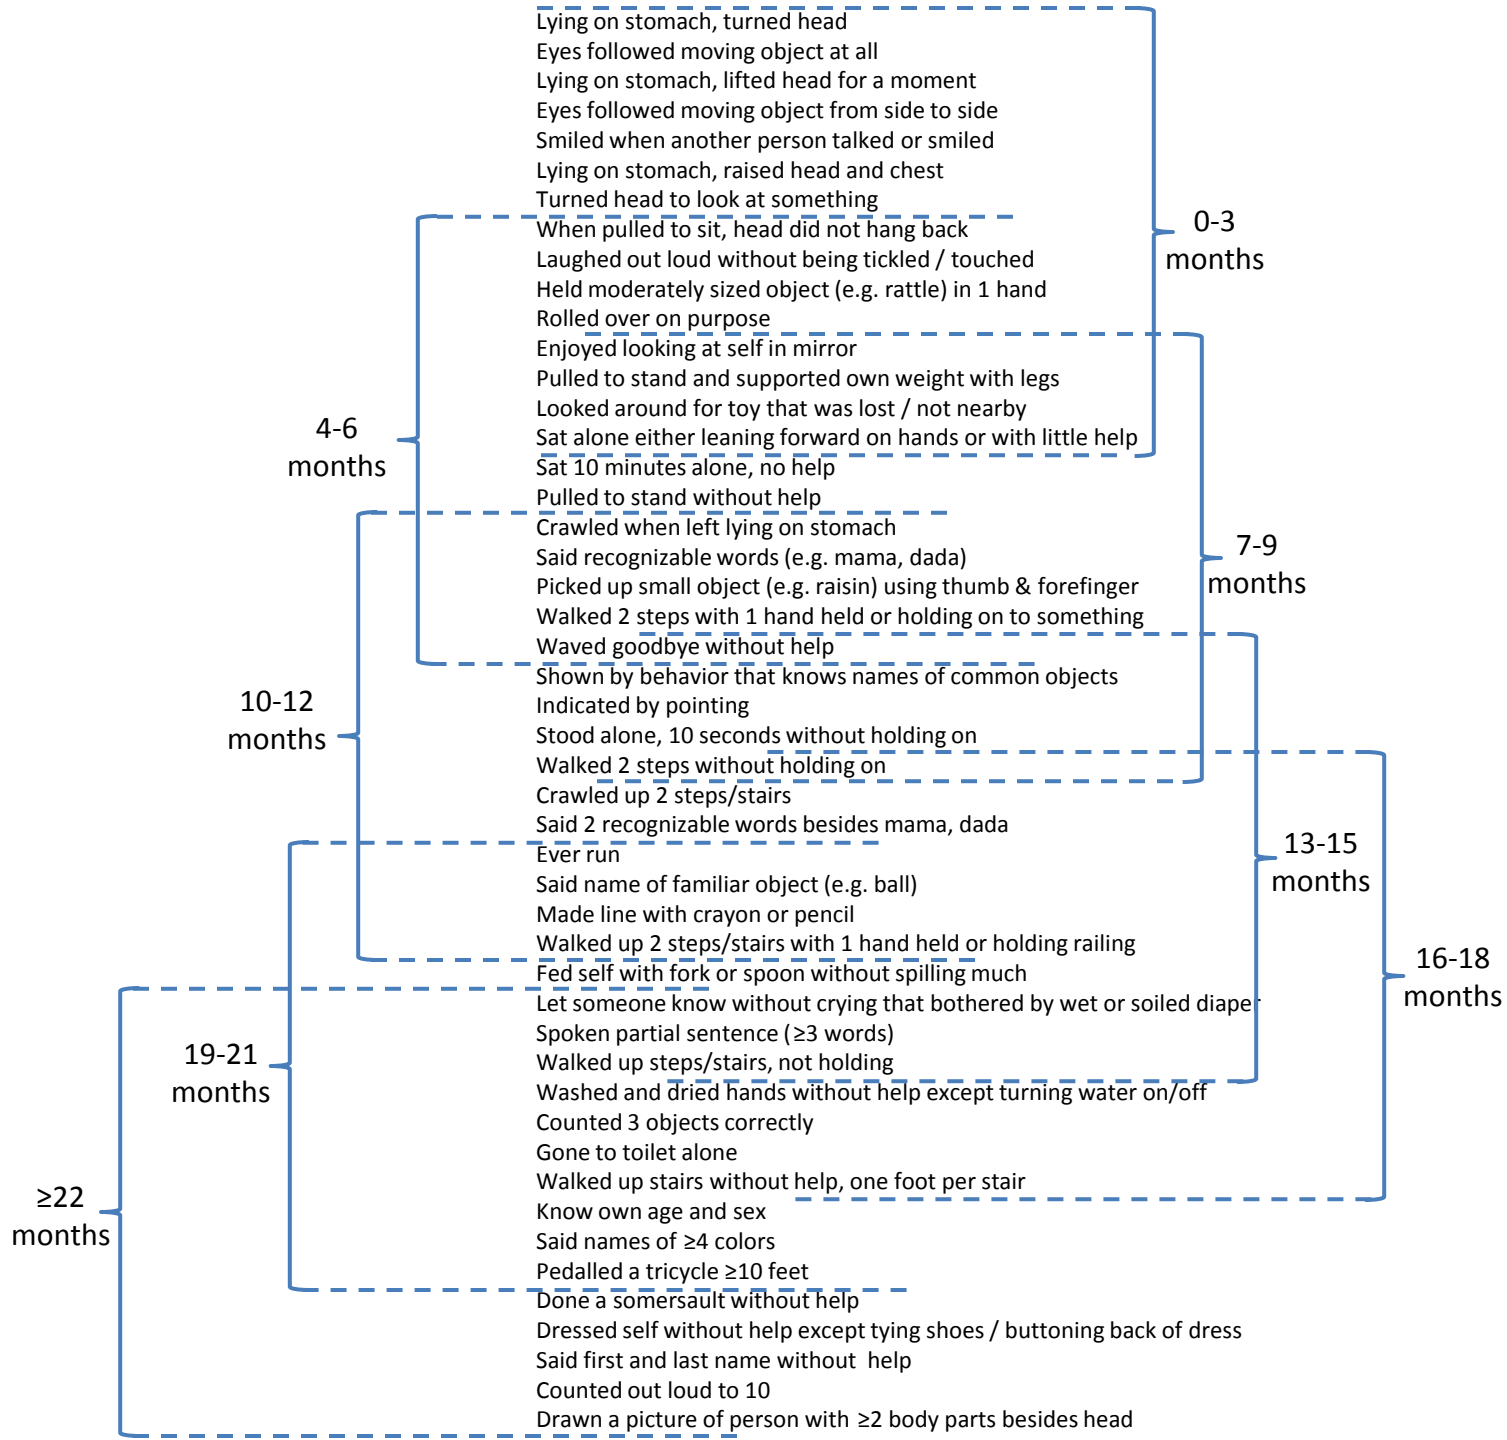

Supplement: NIHMS417906-supplement-Supp_FigureS1.pdf [file NIHMS417906-supplement-Supp_FigureS1.pdf]
